## Prognostic significance of heparanase expression in primary and metastatic breast carcinoma

Olga Vornicova<sup>1</sup>, Inna Naroditsky<sup>2</sup>, Ilanit Boyango<sup>3</sup>, Shlomit S. Shachar<sup>1</sup>, Tanya Mashiach<sup>4</sup>, Neta Ilan<sup>3</sup>, Israel Vlodavsky<sup>3</sup> and Gil Bar-Sela<sup>1</sup>

<sup>1</sup>Division of Oncology, Rambam Health Care Campus, Haifa, Israel

<sup>2</sup>Departments of Pathology, Rambam Health Care Campus, Haifa, Israel

<sup>3</sup>Cancer and Vascular Biology Research Center, Bruce Rappaport Faculty of Medicine, Technion-Israel Institute of Technology, Haifa, Israel

<sup>4</sup>Statistics, Rambam Health Care Campus, Haifa, Israel

**Correspondence to:** Gil Bar-Sela, **email:** g\_barsela@rambam.health.gov.il  
Israel Vlodavsky, **email:** vlodavsk@mail.huji.ac.il

**Keywords:** heparanase; breast carcinoma; metastasis; survival; discordance

**Received:** September 27, 2017

**Accepted:** November 26, 2017

**Published:** December 21, 2017

**Copyright:** Vornicova et al. This is an open-access article distributed under the terms of the Creative Commons Attribution License 3.0 (CC BY 3.0), which permits unrestricted use, distribution, and reproduction in any medium, provided the original author and source are credited.

### ABSTRACT

**High levels of heparanase are detected in many types of tumors, associated with bad prognosis. Typically, heparanase levels are evaluated in a biopsy taken from the primary lesion, whereas its expression by the resulting metastases is most often unresolved. This becomes critically important as anti-heparanase compounds enter advanced clinical trials. Here, we examined the expression of heparanase in pairs of primary and the resulting distant metastases of breast carcinoma. Interestingly, we found that heparanase expression in the metastatic lesion does not always reflect its expression in the primary tumor. Accordingly, in some cases, the primary lesion was stained positive for heparanase while the metastasis stained negative, and vice versa. Heparanase discordance occurred in 38% of the patients, higher than that reported for hormone receptors, and was associated with bad prognosis. Thus, examination of heparanase levels in the tumor metastases should be evaluated for most efficient precision medicine applying heparanase inhibitors. Furthermore, we found that in stage I breast cancer patients strong heparanase staining is associated with shorter overall survival. Thus, heparanase levels can assist in the diagnosis and in determining the necessity and type of treatment in early stage breast cancer.**

### INTRODUCTION

Heparanase is an endo- $\beta$ -D-glucuronidase that cleaves heparan sulfate (HS) side chains of heparan sulfate proteoglycans (HSPG). This activity is responsible for remodeling of the extracellular matrix (ECM), thereby promoting cell dissemination associated with tumor metastasis, angiogenesis and inflammation [1, 2]. Heparanase expression is low in normal epithelia but its expression is up-regulated in many carcinomas as well as sarcomas and hematological malignancies [1–4]. Notably, cancer patients exhibiting high levels of heparanase had a significantly shorter postoperative survival time than patients whose tumors exhibit low levels of heparanase, thus supporting its pro-metastatic

function [1, 2]. More recent studies provided compelling evidence that tie heparanase levels with all steps of tumor formation including tumor initiation, growth, metastasis, and chemoresistance [5–11]. These and other results indicate that heparanase is causally involved in cancer progression and hence is a valid target for anti-cancer drug development. This notion is reinforced by preclinical studies revealing a marked inhibition of tumor growth in mice treated with heparanase-inhibitors, now in phase I/II clinical trials in cancer patients [12–14].

The same principles are also relevant to breast cancer. Heparanase is undetected in normal breast epithelium but its expression is induced in human breast carcinoma, associated with increased tumor metastasis and larger tumor size [15–17]. Similarly, overexpression

of heparanase promotes, while anti-heparanase siRNA decreases the growth, angiogenesis, and metastasis of breast carcinoma cells [18–20]. In addition, heparanase inhibitors were found to efficiently attenuate the tumorigenic capacity of breast carcinoma cells [21, 22], altogether implying that heparanase plays a decisive role in breast cancer [17].

Most often, anticancer treatment is initiated after resection of the primary tumor and is directed against remaining tumor cells and micrometastases. Paradoxically, however, most studies examined heparanase levels in the primary tumor and not in the resulting metastases that are the prime target of heparanase inhibitors. This becomes critically important as anti-heparanase compounds enter advanced clinical trials [23]. Recently, we reported that most melanoma metastases are stained positive for heparanase [24]. Moreover, we found that in stage IVc melanoma patients, high heparanase expression in the metastases predicts poorer prognosis, clearly implying that heparanase levels in the metastatic lesions affect the disease outcome [24]. Here, we examined the expression of heparanase in primary and metastatic breast carcinoma. Unlike the melanoma cohort, in this study, we obtained pairs of the primary and the resulting distant metastases from the same patient. Interestingly, we found that heparanase expression in the metastatic lesion does not always reflect its expression in the primary tumor. Accordingly, in some cases, the primary lesion was stained positive for heparanase while the metastasis stained negative, and vice versa. Notably, the cases in which heparanase expression was changed had a poorer prognosis compared with cases in which heparanase expression was not altered. Furthermore, we found that in stage I breast cancer patients strong heparanase staining is associated with shorter overall survival. Thus, heparanase levels can assist in the diagnosis, necessity, and type of treatment in early stage breast cancer.

## RESULTS

### Heparanase staining is different in metastases vs primary tumor

In order to examine the expression of heparanase in primary tumors vs metastases, we collected specimens from 121 breast carcinomas. Fifty patients developed recurrent disease during follow-up, but paraffin slides were available only from 42 patients. Applying immunohistochemistry we found that in some cases, the primary tumor and resulting metastases exhibit similar staining pattern of heparanase, as exemplified in patients 6 (p6; Figure 1A, upper panel) 58, 8, 9, 10, 27 & 28 (Supplementary Figure 1). In other cases, however, we found that heparanase staining is changed significantly in the primary tumor vs its metastasis, in both ways. As

exemplified in patients 5 (p5; Figure 1A), 57 and 25 (Supplementary Figure 2), the primary tumor is stained negative for heparanase while the metastasis lesion is stained strongly. The opposite scenario occurs in patients 38 (p38; Figure 1A, third panel) and 56 (Supplementary Figure 2, middle panels) where the primary tumor is stained strongly whereas the metastasis is stained negative for heparanase. Staining extent was typically high (i.e., 70–80% of the cells are stained positive for heparanase), and this parameter was not included in subsequent analyses.

When combining heparanase staining in the primary tumor and its metastases (42 pairs), the following results were obtained: In 26 cases there was no difference between heparanase staining in the primary tumor vs metastases (strong remained strong, weak or negative remained weak or negative), whereas in 16 cases (38%) heparanase expression was changed significantly (Table 1). Interestingly, patients (16) in which heparanase staining between primary tumor and metastasis was changed exhibited worse prognosis vs patients exhibiting stable heparanase pattern (HR 0.035;  $p = 0.005$ ) (Figure 1B).

### High heparanase levels predict bad prognosis in stage I breast cancer patients

We next analyzed the staining of heparanase in the primary tumors in relation to clinical parameters. Demographic and clinical description of the patients is summarized in Table 2. The median age for the entire group was 53. One-third of the patients (35%) were diagnosed with stage I disease (Ia-Ib), 43% were diagnosed with stage II disease, and 23% with stage III. Fifty-nine patients (49%) had lymph node involvement at presentation (Table 2). The extent of heparanase staining appeared similar in most specimens. In contrast, staining intensity varied considerably among patients. Of the 121 biopsies of primary breast carcinoma, 51 exhibited strong staining of heparanase (+2; Figure 2A, lower panels), of which 22 (43%) were diagnosed later with metastatic disease. Seventy samples were stained negative (Figure 2A, upper panel) or weak (+1; Figure 2A, middle panels) for heparanase, of which 28 (40%) developed metastatic disease (Table 3). There were no statistically significant differences between the groups. Further statistical analysis of the clinical data revealed the prognostic significance of tumor stage, number of involved lymph nodes, and the status of estrogen receptor (Table 2), as expected. This implies that our patient cohort exhibits typical characteristics of breast cancer. Strong heparanase staining in the primary tumor of the entire cohort was not a prognostic factor for metastatic disease. However, multivariate subgroup analysis showed that in stage I patients, negative staining for heparanase is associated with significantly better disease-free survival (HR 4.52;  $p = 0.03$ ) (Figure 2B).

## DISCUSSION

Breast cancer is the most common type of malignancy in females; it is estimated that 246,660 new cases will be diagnosed in 2017 in the USA [25]. Despite noticeable progress in diagnostic and therapeutic approaches, many patients still develop metastases, resulting in about 40,000 deaths annually [25]. Treatment of metastatic breast cancer, as well as early-stage breast cancer, is based on the status of estrogen receptor (ER), progesterone receptor (PR), and epidermal growth factor receptor 2 (HER2). In addition, other factors are routinely used for therapy decision-making, including disease-free interval, site(s) of relapse, number of metastases, proliferation index and histological grade; Stage of disease remains the most important predictive factor [26].

Notably, phenotype discordance in hormone receptors (ER and PR) and HER2 status between primary and recurrent breast cancer has been repeatedly reported [27, 28] and accounts, at least in part, to treatment failure [29]. Moreover, studies employing gene expression profiling of primary breast cancers and matched axillary lymph node metastases have found that breast cancer

metastases are molecularly distinct from their primary tumors, and many genes are differentially expressed between primary tumors and metastases [27]. Our results add heparanase to the growing list of proteins that are differentially expressed by the primary tumor and its metastases. The reason for this is not entirely clear, but may be attributable to the clonal nature of metastases and its genomic instability, leading to continuous alterations. According to this notion, metastatic disease evolution is associated with altering tumor biology. This concept is supported by a recent study showing that discordance continues also from the first to second metastases [30]. Interestingly, tumors in which heparanase expression was different between the primary tumor and its metastases exhibited inferior prognosis compared with tumors in which heparanase expression was stable (Figure 1B). This is in agreement with previous publications showing the same phenomena upon discordance in ER/PR/HER2 expression [27]. Reassessing the biological features of disease is not currently considered mandatory, but recent international guidelines recommend that when there is discordance of ER, PR, or HER2 between primary and metastatic tissues then their status in the metastases should be considered to direct therapy [31]. The same rationale

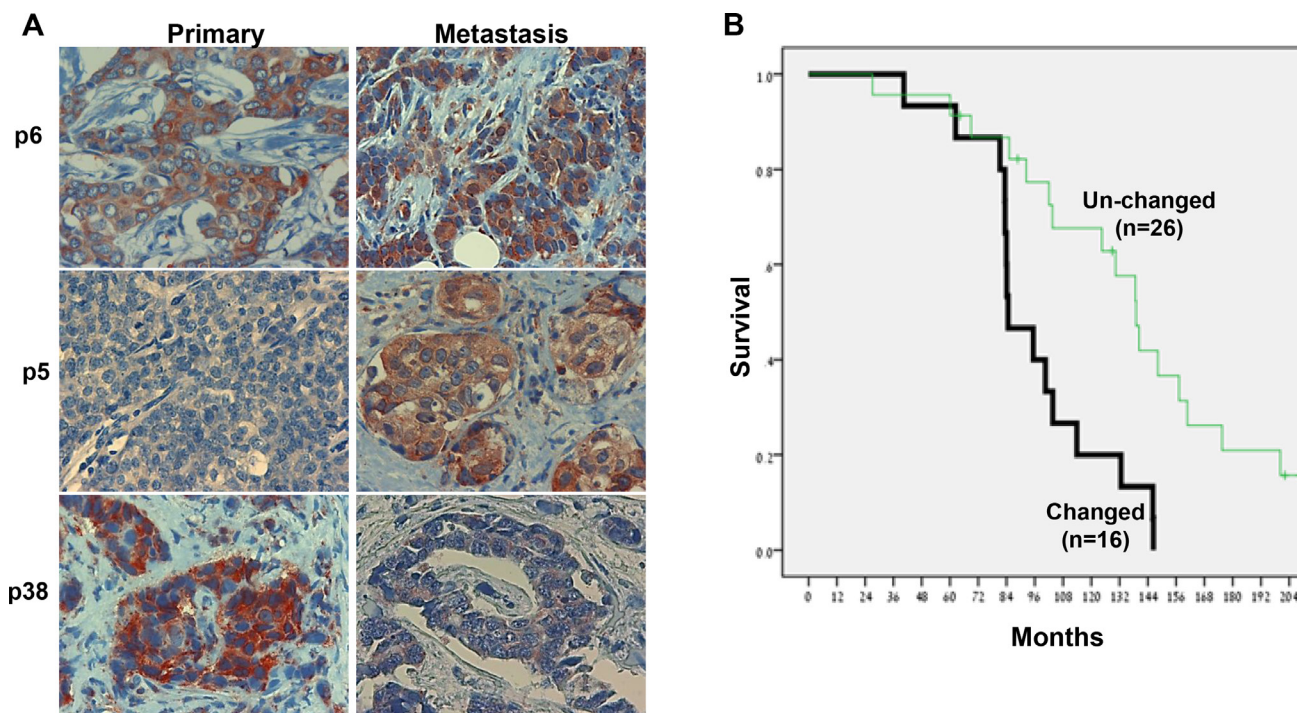

**Figure 1: Discordance of heparanase staining in primary vs metastatic breast cancer.** (A) Immunostaining. Forty-two pairs of primary breast carcinomas and resulting metastases were subjected to immunostaining applying anti-heparanase antibody. Shown are representative photomicrographs of cases in which heparanase staining appeared comparable in the primary and metastatic lesions (p6; upper panels), cases in which heparanase was low in the tumor cells of the primary lesion but appears high in the metastases (p5; second panels), and cases in which heparanase staining was strong in the primary tumor but negative in the resulting metastases (p38; third panel). (B) Kaplan-Meier survival analysis. The survival of patients in which heparanase staining in the primary and metastases appeared similar (Un-changed;  $n = 26$ ) was compared to patients in which heparanase staining was changed in the primary vs metastases (Changed;  $n = 16$ ). Note that discordance of heparanase expression correlates with a significant decrease in patient survival (HR 0.035;  $p = 0.005$ ). Original magnifications:  $\times 100$ .

**Table 1: Heparanase staining in primary and metastatic breast cancer (42 patients)**

|                                         | Number of patients (%) |
|-----------------------------------------|------------------------|
| Similar:                                | 26 (62)                |
| Primary weak/ metastasis weak (-/-)     | 14                     |
| Primary strong/ metastasis strong (+/+) | 12                     |
| Not similar:                            | 16 (38)                |
| Primary weak/ metastasis strong (-/+)   | 10                     |
| Primary strong/ metastasis weak (+/-)   | 6                      |

**Table 2: Demographic and clinical characteristics of the patients enrolled in this study**

|                       |            | N (%)   | No of events* (%) | P value** | HR    | CI         |
|-----------------------|------------|---------|-------------------|-----------|-------|------------|
| Stage                 | IA or IB   | 41 (34) | 12 (29)           | 0.008     | 1.00  |            |
|                       | IIA        | 29 (24) | 18 (62)           | 0.007     | 2.74  | 1.32-5.69  |
|                       | IIB        | 23 (19) | 11 (48)           | 0.056     | 2.23  | 0.98-5.10  |
|                       | IIIA       | 19 (16) | 12 (63)           | 0.002     | 3.55  | 1.57-8.03  |
|                       | IIIB       | 8 (7)   | 6 (75)            | 0.0001    | 5.97  | 2.20-16.20 |
|                       | DCIS (Tis) | 1 (1)   | 1                 | 0.399     | 2.41  | 0.31-18.74 |
| Lymph nodes           | None       | 60 (51) | 24 (40)           | 0.013     | 1.00  |            |
|                       | 1-3        | 43 (36) | 24 (56)           | 0.057     | 1.74  | 0.99-3.09  |
|                       | 4+         | 15 (13) | 11 (73)           | 0.005     | 2.87  | 1.38-5.96  |
|                       | Missing    | 3       |                   |           |       |            |
| Grade                 | I          | 8 (7)   | 3 (37)            | 0.803     | 1.00  |            |
|                       | II         | 59 (53) | 29 (49)           | 0.556     | 1.43  | 0.44-4.70  |
|                       | III        | 45 (40) | 21 (47)           | 0.507     | 1.51  | 0.45-5.05  |
|                       | Missing    | 9       |                   |           |       |            |
| Estrogen receptors    | Negative   | 27 (23) | 18 (67)           |           | 1.00  |            |
|                       | Positive   | 91 (77) | 41 (45)           | 0.028     | 0.54  | 0.31-0.93  |
|                       | Missing    | 3       |                   |           |       |            |
| HER-2                 | Negative   | 65 (81) | 29 (46)           |           | 1.00  |            |
|                       | Positive   | 15 (19) | 8 (53)            | 0.540     | 1.29  | 0.58-2.87  |
|                       | Missing    | 41      |                   |           |       |            |
| Progesterone receptor | Negative   | 42 (36) | 22 (52)           | 0.92      | 0.718 |            |
|                       | Positive   | 75 (64) | 36 (48)           |           | 0.838 |            |
|                       | Missing    | 4       |                   |           |       |            |

\*Events = relapse or mortality \*\*p value is calculated for each group in relation to the other sub-groups.

should ideally be applied to anti-heparanase treatment, for most effective precision medicine. Clearly, the discordance in heparanase levels showed here needs to be confirmed in a larger cohort of patients, ideally employing also additional methodology such as quantitative PCR.

The role of heparanase in breast cancer has been extensively examined in preclinical studies, but clinical evidence is limited. A Recent publication, analyzing the results obtained in several independent patient cohorts,

showed that high levels of heparanase are associated with poor 5-year survival in breast cancer patients [17]. Early, stage I, breast cancer is particularly challenging for treatment. According to accumulated data of tumor recurrence in early breast cancer patients, “triple negative tumors” have a more aggressive biological behavior than tumors expressing hormone receptor and/or HER2 [32]. Patients with hormone positive tumors usually receive adjuvant hormone therapy, but in this population, there is

**Table 3: Heparanase staining intensity and recurrent disease in breast carcinomas**

| Heparanase staining intensity | Number of patients (%) | Recurrent disease (%) |
|-------------------------------|------------------------|-----------------------|
| Negative (0)                  | 16 (13)                | 5 (31)                |
| Weak (+1)                     | 54 (45)                | 23 (42)               |
| Strong (+2)                   | 51 (42)                | 22 (43)               |

a group of patients that may have better chances of full recovery with the addition of chemotherapy to adjuvant treatment [33]. Recently, several multigene assays have been developed to improve patient selection among women with early stage, hormone positive and HER2 negative, breast cancer that have a higher risk for disease recurrence and may benefit from adding chemotherapy to adjuvant hormone therapy [34, 35].

Patients with hormone-negative tumors usually receive chemotherapy to reduce the risk of disease recurrence if their tumor was larger than 1 cm, and in certain cases even with only 6 mm tumor (NCCN Guidelines). Predictive factors for this group of patients that may reduce the need for chemotherapy are not known yet. Here, we found that high levels of heparanase in stage I breast cancer (with tumors smaller than 2 cm and without lymph node involvement) correlates with a 4.5-fold increased risk of disease recurrence (Figure 2B). This finding may serve as a new prognostic marker that may ease the debate of providing or not preventive chemotherapy for patients with stage I breast cancer.

While this observation needs further confirmation in a larger patient cohort, it may turn important and beneficial in the clinic.

Taken together, the results clearly show that heparanase is critically important for the progression of stage I breast cancer. Moreover, we show for the first time the complexity of heparanase expression in the primary tumors vs metastatic lesions. Heparanase discordance occurred in 38% of the patients, higher than that reported for hormone receptors, and was associated with bad prognosis. Thus, examination of heparanase levels in the tumor metastases should be evaluated for most efficient precision medicine applying heparanase inhibitors.

## MATERIALS AND METHODS

### Study population

Paraffin blocks were obtained from 121 patients diagnosed with breast cancer (invasive ductal carcinoma)

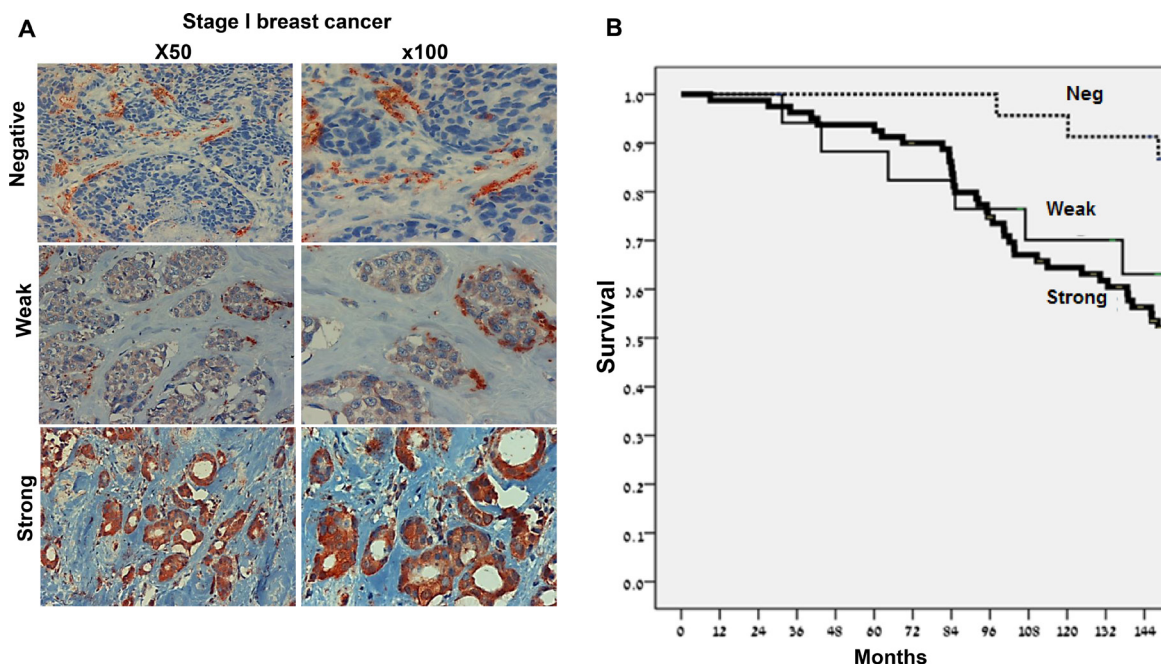

**Figure 2: High levels of heparanase are associated with reduced survival of stage I breast cancer patients.** (A) Immunostaining. Stage I breast carcinomas were subjected to immunostaining applying anti-heparanase antibody. Shown are representative photomicrographs of cases exhibiting no staining of heparanase in the tumor cells (positive staining is detected in stromal cells; upper panels), weak (middle panels) or strong (lower panels) staining. (B) Kaplan-Meier survival analysis. The survival of patients was examined according to heparanase staining intensity. Note bad prognosis of stage I breast cancer patients that exhibit strong staining of heparanase (HR 4.52;  $p = 0.03$ ).

and treated in the Rambam Health Care Campus, Haifa, Israel, between the years 1990–2014. Fifty patients were diagnosed with recurrent metastatic disease during follow up, of which 42 had tissue samples available for immunostaining. These included metastases to lymph nodes (12), bones (8), liver (7), breast (6), lung (4), brain (1) and other organs. The other 71 patients were under surveillance for at least 10 years with no evidence of active disease. All patients received standard of care treatment for breast cancer, according to the time of diagnosis and were under surveillance in the Oncology Department, Rambam Health Care Campus, Haifa, Israel. Their performance was analyzed in correlation with pathological, demographic and clinical characteristics, including the stage of disease (TNM), pathological grade, estrogen and progesterone receptor status (ER, PR), HER2 expression (where available), metastatic disease, and treatment modality (chemotherapy, trastuzumab, hormonal and radiation therapies). Patients were excluded from final analyses if tissue samples were not available for staining. The study was approved by the Rambam hospital's Helsinki Committee.

### Immunohistochemistry

Biopsies were subjected to immunostaining applying anti-heparanase antibody (#733) essentially as described [23] and staining of the entire specimen section was evaluated by a senior pathologist (IN) who was blind to clinical data of the patients. Staining was scored according to the intensity (0: none; +1: weak-moderate; +2: strong) and extent (i.e., percent of heparanase-positive cells) in the malignant cells. Specimens that were similarly stained with normal rabbit serum or by applying the above procedure but lacking the primary antibody yielded no detectable staining.

### Statistics

A comparison was made between the demographic data, the disease characteristics and the intensity of heparanase staining by using a bivariate logistic regression. Cox regression model was used to determine factors influencing survival, illustrated by Kaplan-Meier curves. The level of significance selected to examine the various parameters in this study was set at  $p \leq 0.05$ . The data were processed using SPSS statistical software, version 21.0 (Chicago IL).

### CONFLICTS OF INTEREST

None.

### FUNDING

This work was supported by research grants awarded to I.V by the Israel Science Foundation (grant 601/14);

the United States-Israel Binational Science Foundation (BSF); the Israel Cancer Research Fund (ICRF); and the Rappaport Family Institute Fund. I. Vlodaysky is a Research Professor of the ICRF.

### Editorial note

This paper has been accepted based in part on peer-review conducted by another journal and the authors' response and revisions as well as expedited peer-review in *Oncotarget*.

### REFERENCES

1. Barash U, Cohen-Kaplan V, Doweck I, Sanderson RD, Ilan N, Vlodaysky I. Proteoglycans in health and disease: new concepts for heparanase function in tumor progression and metastasis. *FEBS J.* 2010; 277:3890–3903.
2. Vlodaysky I, Beckhove P, Lerner I, Pisano C, Meirovitz A, Ilan N, Elkin M. Significance of heparanase in cancer and inflammation. *Cancer Microenviron.* 2012; 5:115–132.
3. Ilan N, Elkin M, Vlodaysky I. Regulation, function and clinical significance of heparanase in cancer metastasis and angiogenesis. *Intl J Biochem and Cell Biol.* 2006; 38:2018–2039.
4. Vreys V, David G. Mammalian heparanase: what is the message? *J Cell Mol Med.* 2007; 11:427–452.
5. Boyango I, Barash U, Fux L, Naroditsky I, Ilan N, Vlodaysky I. Targeting heparanase to the mammary epithelium enhances mammary gland development and promotes tumor growth and metastasis. *Matrix Biology.* 2017. [Epub ahead of print].
6. Arvatz G, Shafat I, Levy-Adam F, Ilan N, Vlodaysky I. The heparanase system and tumor metastasis: is heparanase the seed and soil? *Cancer Metastasis Rev.* 2011; 30:253–268.
7. Barash U, Zohar Y, Wildbaum G, Beider K, Nagler A, Karin N, Ilan N, Vlodaysky I. Heparanase enhances myeloma progression via CXCL10 downregulation. *Leukemia.* 2014; 28:2178–2187.
8. Boyango I, Barash U, Naroditsky I, Li JP, Hammond E, Ilan N, Vlodaysky I. Heparanase cooperates with Ras to drive breast and skin tumorigenesis. *Cancer Res.* 2014; 74:4504–4514.
9. Ramani VC, Zhan F, He J, Barbieri P, Nosedo A, Tricot G, Sanderson RD. Targeting heparanase overcomes chemoresistance and diminishes relapse in myeloma. *Oncotarget.* 2015; 7:1598–1607. <https://doi.org/10.18632/oncotarget.6408>.
10. Shteingauz A, Boyango I, Naroditsky I, Hammond E, Gruber M, Doweck I, Ilan N, Vlodaysky I. Heparanase enhances tumor growth and chemoresistance by promoting autophagy. *Cancer Res.* 2015; 75:3946–3957.
11. Weissmann M, Arvatz G, Horowitz N, Feld S, Naroditsky I, Zhang Y, Ng M, Hammond E, Nevo E, Vlodaysky I, Ilan

- N. Heparanase-neutralizing antibodies attenuate lymphoma tumor growth and metastasis. *Proc Natl Acad Sci USA*. 2016; 113:704–709.
12. Ferro V, Hammond E, Fairweather JK. The development of inhibitors of heparanase, a key enzyme involved in tumour metastasis, angiogenesis and inflammation. *Mini Rev Med Chem*. 2004; 4:693–702.
  13. Ritchie JP, Ramani VC, Ren Y, Naggi A, Torri G, Casu B, Penco S, Pisano C, Carminati P, Tortoreto M, Zunino F, Vlodayvsky I, Sanderson RD, et al. SST0001, a chemically modified heparin, inhibits myeloma growth and angiogenesis via disruption of the heparanase/syndecan-1 axis. *Clin Cancer Res*. 2011; 17:1382–1393.
  14. Vlodayvsky I, Ilan N, Naggi A, Casu B. Heparanase: structure, biological functions, and inhibition by heparin-derived mimetics of heparan sulfate. *Curr Pharm Des*. 2007; 13:2057–2073.
  15. Imada T, Matsuoka J, Nobuhisa T, Okawa T, Murata T, Tabuchi Y, Shirakawa Y, Ohara N, Gunduz M, Nagatsuka H, Umeoka T, Yamamoto Y, Nakajima M, et al. COX-2 induction by heparanase in the progression of breast cancer. *Int J Mol Med*. 2006; 17:221–228.
  16. Maxhimer JB, Quiros RM, Stewart R, Dowlatshahi K, Gattuso P, Fan M, Prinz RA, Xu X. Heparanase-1 expression is associated with the metastatic potential of breast cancer. *Surgery*. 2002; 132:326–333.
  17. Sun X, Zhang G, Nian J, Yu M, Chen S, Zhang Y, Yang G, Yang L, Cheng P, Yan C, Ma Y, Meng H, Wang X, et al. Elevated heparanase expression is associated with poor prognosis in breast cancer: a study based on systematic review and TCGA data. *Oncotarget*. 2017; 8:43521–43535. <https://doi.org/10.18632/oncotarget.16575>.
  18. Cohen I, Pappo O, Elkin M, San T, Bar-Shavit R, Hazan R, Peretz T, Vlodayvsky I, Abramovitch R. Heparanase promotes growth, angiogenesis and survival of primary breast tumors. *Int J Cancer*. 2006; 118:1609–1617.
  19. Gotte M, Yip GW. Heparanase, hyaluronan, and CD44 in cancers: a breast carcinoma perspective. *Cancer Res*. 2006; 66:10233–10237.
  20. Zhang ZH, Chen Y, Zhao HJ, Xie CY, Ding J, Hou YT. Silencing of heparanase by siRNA inhibits tumor metastasis and angiogenesis of human breast cancer *in vitro* and *in vivo*. *Cancer Biol and Therapy*. 2007; 6:587–595.
  21. Dredge K, Hammond E, Handley P, Gonda TJ, Smith MT, Vincent C, Brandt R, Ferro V, Bytheway I. PG545, a dual heparanase and angiogenesis inhibitor, induces potent anti-tumour and anti-metastatic efficacy in preclinical models. *Br J Cancer*. 2011; 104:635–642.
  22. Hammond E, Brandt R, Dredge K. PG545, a heparan sulfate mimetic, reduces heparanase expression *in vivo*, blocks spontaneous metastases and enhances overall survival in the 4T1 breast carcinoma model. *PLoS one*. 2012; 7:e52175.
  23. Dredge K, Brennan T, Paul Brown M, Lickliter JD, Bampton D, Hammond H, Lin L, Yang Y, Millward M. An open-label, multicenter phase I study of the safety and tolerability of the novel immunomodulatory agent PG545 in subjects with advanced solid tumors. *J Clin Oncol*. 2017; 35.
  24. Vornicova O, Boyango I, Feld S, Naroditsky I, Kazarin O, Zohar Y, Tiram Y, Ilan N, Ben-Izhak O, Vlodayvsky I, Bar-Sela G. The prognostic significance of heparanase expression in metastatic melanoma. *Oncotarget*. 2016; 7:74678–74685. <https://doi.org/10.18632/oncotarget.12492>.
  25. Siegel RL, Miller KD, Jemal A. Cancer statistics, 2016. *CA Cancer J Clin*. 2016; 66:7–30.
  26. Cardoso F, Costa A, Senkus E, Aapro M, Andre F, Barrios CH, Bergh J, Bhattacharyya G, Biganzoli L, Cardoso MJ, Carey L, Corneliusen-James D, Curigliano G, et al. 3rd ESO-ESMO International Consensus Guidelines for Advanced Breast Cancer (ABC 3). *Annals of oncology*. 2017.
  27. Kroigard AB, Larsen MJ, Thomassen M, Kruse TA. Molecular Concordance Between Primary Breast Cancer and Matched Metastases. *Breast J*. 2016; 22:420–430.
  28. Yeung C, Hilton J, Clemons M, Mazzarello S, Hutton B, Hagggar F, Addison CL, Kuchuk I, Zhu X, Gelmon K, Arnaout A. Estrogen, progesterone, and HER2/neu receptor discordance between primary and metastatic breast tumours—a review. *Cancer Metastasis Rev*. 2016; 35:427–437.
  29. Cui X, Schiff R, Arpino G, Osborne CK, Lee AV. Biology of progesterone receptor loss in breast cancer and its implications for endocrine therapy. *J Clin Oncol*. 2005; 23:7721–7735.
  30. Lower EE, Khan S, Kennedy D, Baughman RP. Discordance of the estrogen receptor and HER-2/neu in breast cancer from primary lesion to first and second metastatic site. *Breast Cancer (Dove Med Press)*. 2017; 9:515–520.
  31. Van Poznak C, Somerfield MR, Bast RC, Cristofanilli M, Goetz MP, Gonzalez-Angulo AM, Hicks DG, Hill EG, Liu MC, Lucas W, Mayer IA, Mennel RG, Symmans WF, et al. Use of Biomarkers to Guide Decisions on Systemic Therapy for Women With Metastatic Breast Cancer: *J Clin Oncol*. 2015; 33:2695–2704.
  32. Dent R, Trudeau M, Pritchard KI, Hanna WM, Kahn HK, Sawka CA, Lickley LA, Rawlinson E, Sun P, Narod SA. Triple-negative breast cancer: clinical features and patterns of recurrence. *Clin Cancer Res*. 2007; 13:4429–4434.
  33. Early Breast Cancer Trialists' Collaborative Group (EBCTCG). Effects of chemotherapy and hormonal therapy for early breast cancer on recurrence and 15-year survival: an overview of the randomised trials. *Lancet*. 2005; 365:1687–1717.
  34. Paik S, Shak S, Tang G, Kim C, Baker J, Cronin M, Baehner FL, Walker MG, Watson D, Park T, Hiller W, Fisher ER, Wickerham DL, et al. A multigene assay to predict recurrence of tamoxifen-treated, node-negative breast cancer. *New Eng J Med*. 2004; 351:2817–2826.
  35. Paik S, Tang G, Shak S, Kim C, Baker J, Kim W, Cronin M, Baehner FL, Watson D, Bryant J, Costantino JP, Geyer CE Jr, Wickerham DL, et al. Gene expression and benefit of chemotherapy in women with node-negative, estrogen receptor-positive breast cancer. *J Clin Oncol*. 2006; 24:3726–3734.
